# Supplementary material
Source: Research Square preprint supplement (doi:10.21203/rs.3.rs-10252071/v1)
Supplement: Supplementary file 1 [file 1a565e819a8f55779a2ad6c7.docx]

**SUPPLEMENTARY INFORMATION**

**Dual-functional biomass-based graphene aerogel derived from the Tibetan medicinal plant *Pedicularis kansuensis* for synergistic removal of antibiotic resistance genes in swine wastewater**

Shuai Liu a, Fang Wang a, Mo Chen c, YaXing Wu b, Jing Deng a, Adila Mamatrozi a, Shanshan Wang a, *, Hongtao Jia a, *

a Xinjiang Key Laboratory for Ecological Adaptation and Evolution of Extreme Environment Organisms, College of Life Sciences, Xinjiang Agricultural University, Ürümqi, 830052, P. R. China

b College of Resources and Environment, Xinjiang Agricultural University, Ürümqi, 830052, P. R. China

c College of Grassland Science, Xinjiang Agricultural University, Ürümqi, 830052, P. R. China

* Corresponding author.

E-mail: SSWang0825@163.com (S.S. Wang), [hongtaojia@126.com](mailto:hongtaojia@126.com) (H.T. Jia).

**Contents:**

**Figure S1** Invasion of *Pedicularis kansuensis* in Bayanbulak Grassland

**Figure S2** The inhibitory effect of PKGA on *Escherichia coli* and the growth of *Escherichia coli*, as well as the composition analysis of chemical substances in PKGA

**Table S1** Basic properties of swine wastewater

**Table S2** Primers of the 16S rRNA gene and targeting ARGs in this study


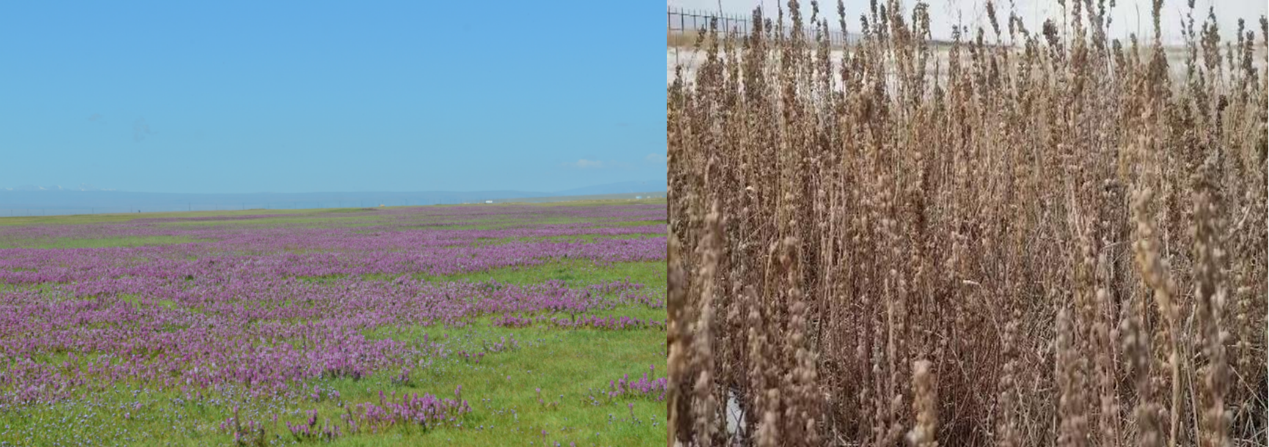


**Figure S1** Invasion of *Pedicularis kansuensis* in Bayanbulak Grassland

**Table S1** Basic properties of swine wastewater.

| **Parameters** | **Values** |
| --- | --- |
| pH | 7.34 |
| COD (mg/L) | 368.00 |
| TP (mg/L) | 6.56 |
| TN (mg/L) | 23.92 |

**Table S2** Primers of the 16S rRNA gene and targeting ARGs in this study

| **Target genes** | **Primer** | **Sequences** |
| --- | --- | --- |
| 16S | 16S rRNA -F | CCTACGGGAGGCAGCAG |
| 16S rRNA -R | ATTACCGCGGCTGCTGG |
| sul1 | sul1-F | CACCGGAAACATCGCTGCA |
| sul1 -R | AAGTTCCGCCGCAAGGCT |
| sul2 | sul2-F | TCCGGTGGAGGCCGGTATATGG |
| sul2-R | CGGGAATGCCATCTGCCTTGAG |
| ermB | ermB -F | AAAACTTACCCGCCATACCA |
| ermB -R | TTTGGCGTGTTTCATTGCTT |
| ermE | ermE -F | TGTTCGAGTGGGAGTTCGT |
| ermE -R | GGTACTTGCGCAGAAGCGA |
| tetA | tetA -F | GCTACATCCTGCTTGCCTTC |
| tetA -R | CATAGATCGCCGTGAAGAGG |
| tetC | tetC -F | CTTGAGAGCCTTCAACCCAG |
| tetC-R | ATGGTCGTCATCTACCTGCC |
| tetW | tetW-F | GAGAGCCTGCTATATGCCAGC |
| tetW-R | GGGCGTATCCACAATGTTAAC |
| tetX | tetX-F | AGCCTTACCAATGGGTGTAAA |
| tetX-R | TTCTTACCTTGGACATCCCG |
| cmlA1-01 | cmlA1-01 -F | TAGGAAGCATCGGAACGTTGAT |
| cmlA1-01 -R | CAGACCGAGCACGACTGTTG |
| cmlA1-02 | cmlA1-02 -F | AGGAAGCATCGGAACGTTGA |
| cmlA1-02 -R | ACAGACCGAGCACGACTGTTG |
| intl1 | intI1-F | CCTCCCGCACGATGATC |
| intI1-R | TCCACGCATCGTCAGGC |


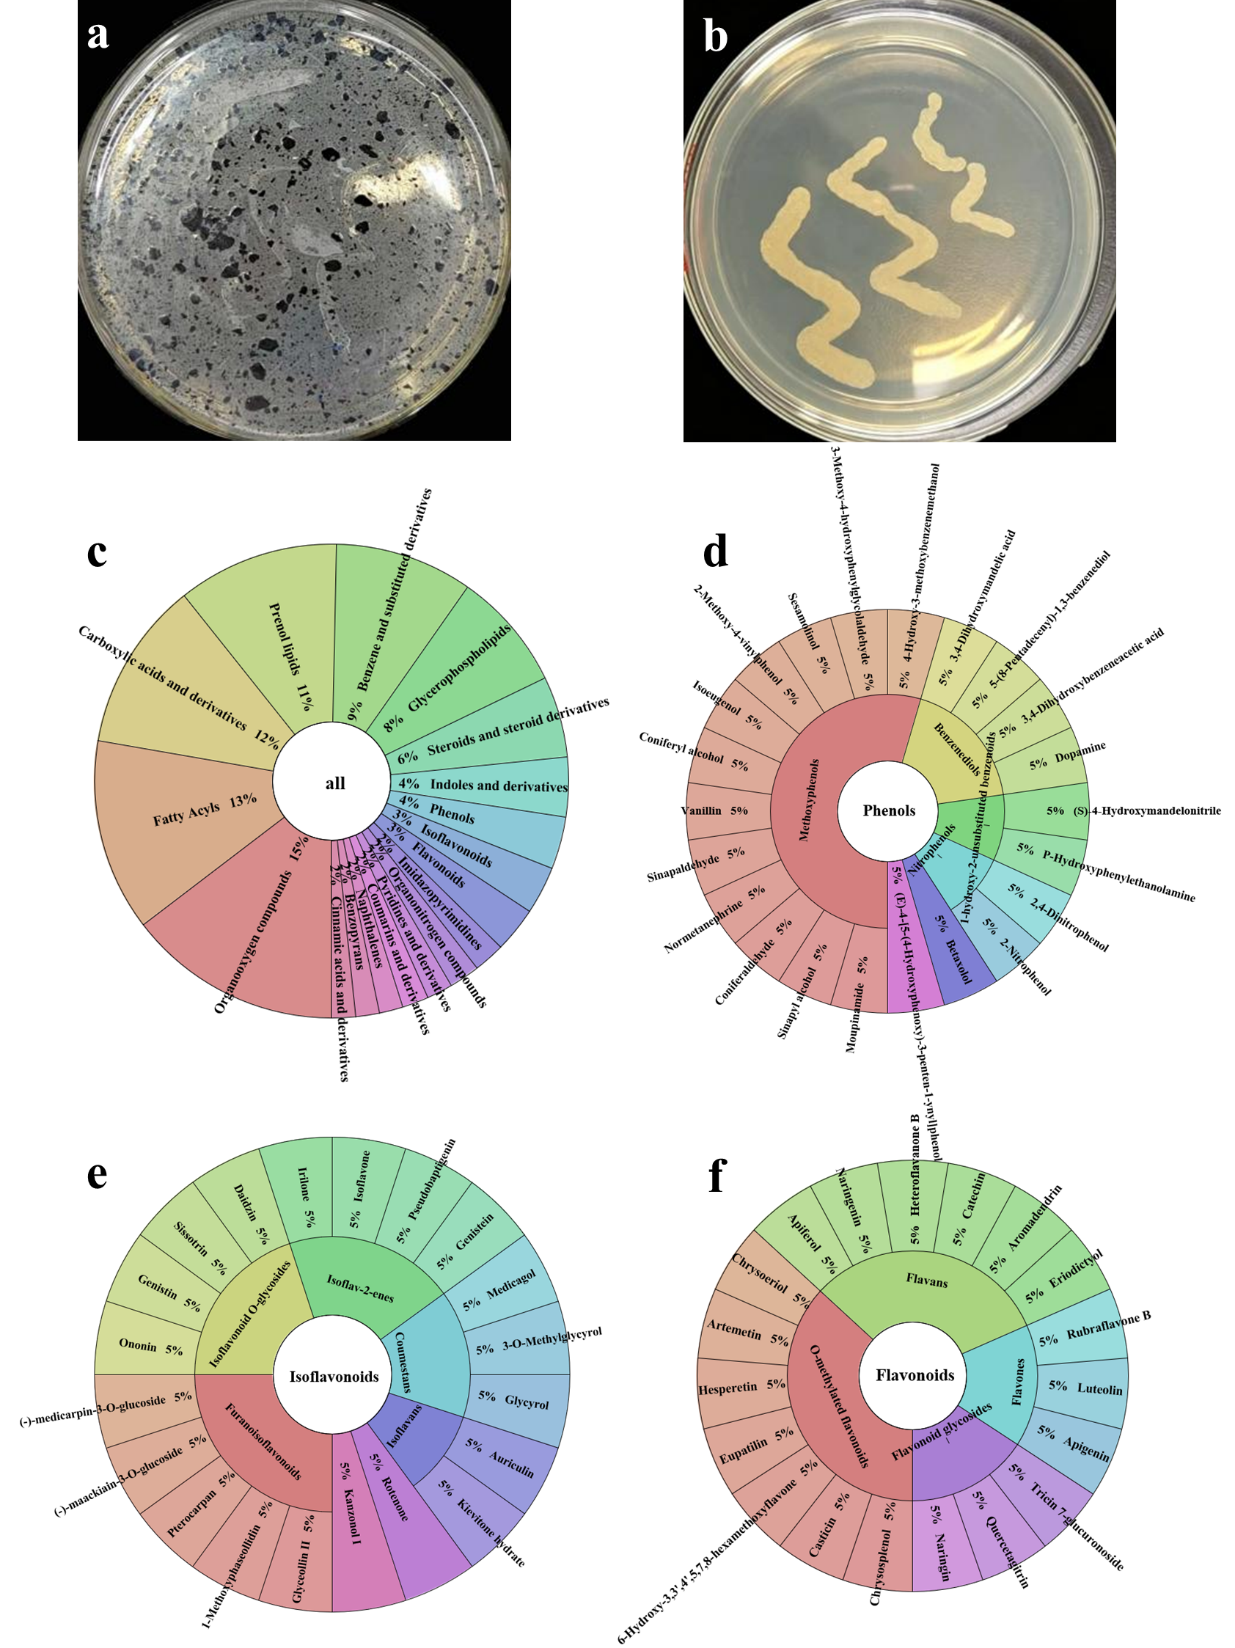


**Figure S2** The inhibitory effect of PKGA on *Escherichia coli* (a) and the growth of *Escherichia coli* (b), as well as the composition analysis of chemical substances in PKGA (c: overall distribution of metabolites; d: Phenolic compounds; e: Isoflavonoids; f: Flavonoids)
