# Supplementary material
Source: Research Square preprint supplement (doi:10.21203/rs.3.rs-10252071/v1)
Supplement: Supplementary file 2 [file 435d78a27bb4c27c674a1cbe.docx]

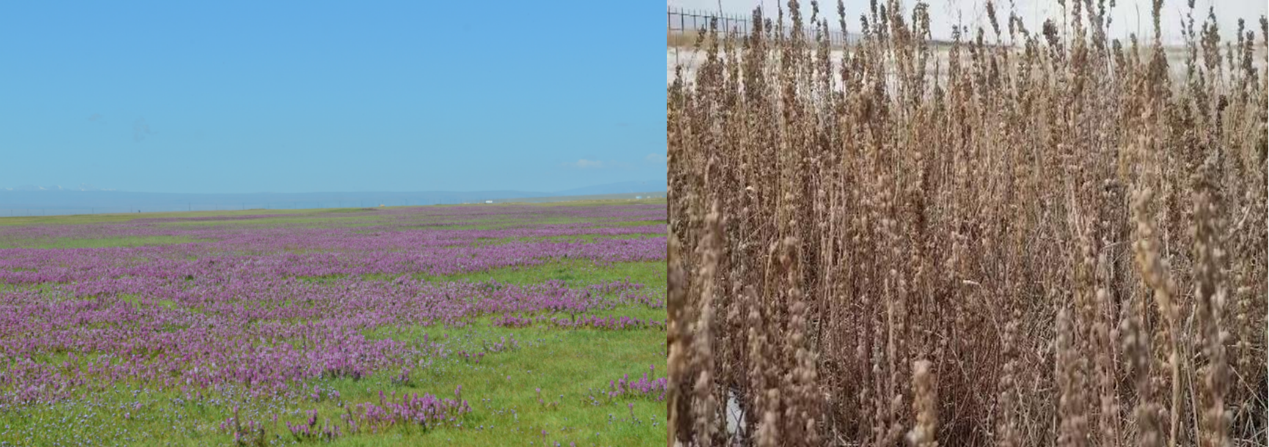


**Figure S1** Invasion of *Pedicularis kansuensis* in Bayanbulak Grassland


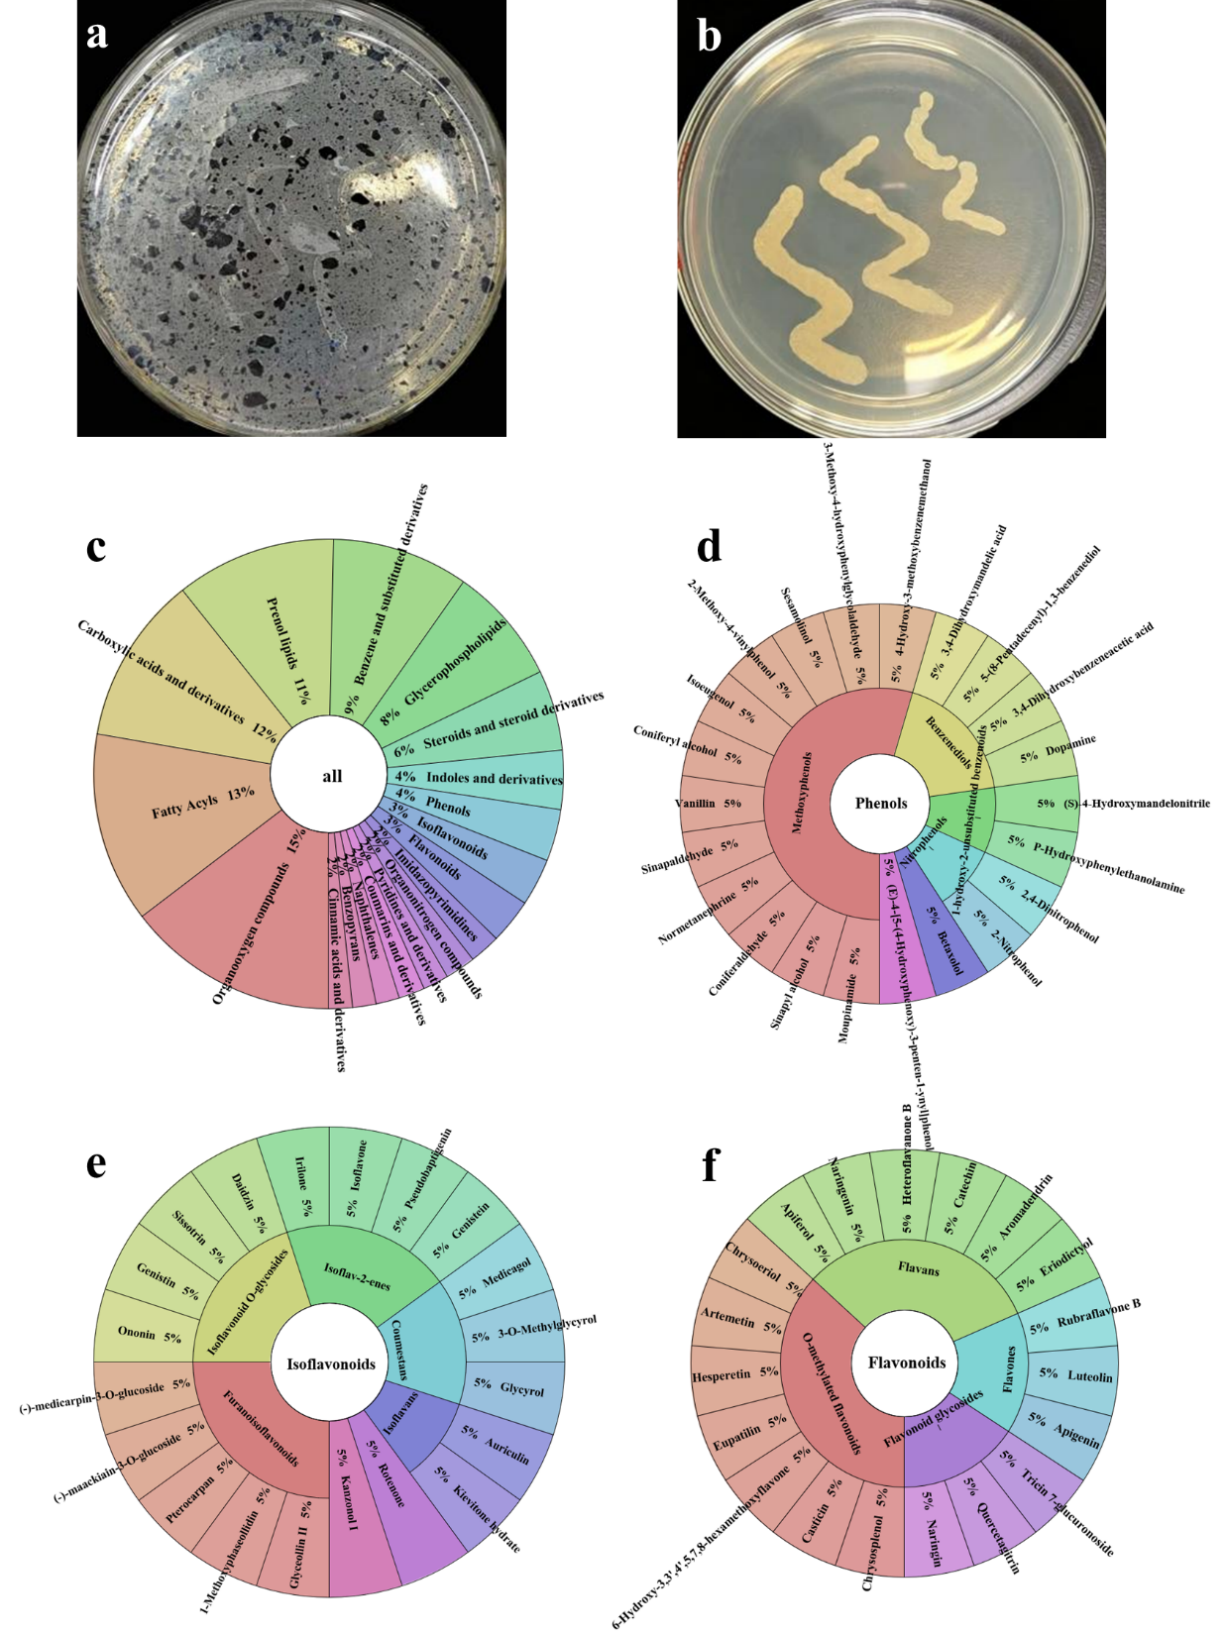


**Figure S2** The inhibitory effect of PKGA on *Escherichia coli* (a) and the growth of *Escherichia coli* (b), as well as the composition analysis of chemical substances in PKGA (c: overall distribution of metabolites; d: Phenolic compounds; e: Isoflavonoids; f: Flavonoids)
