# Supplementary material
Source: Research Square preprint supplement (doi:10.21203/rs.3.rs-10252071/v1)
Supplement: Supplementary file 3 [file f5a3506ee41ba4c9c916af91.docx]

**Table S1** Basic properties of swine wastewater.

| **Parameters** | **Values** |
| --- | --- |
| pH | 7.34 |
| COD (mg/L) | 368.00 |
| TP (mg/L) | 6.56 |
| TN (mg/L) | 23.92 |

**Table S2** Primers of the 16S rRNA gene and targeting ARGs in this study

| **Target genes** | **Primer** | **Sequences** |
| --- | --- | --- |
| 16S | 16S rRNA -F | CCTACGGGAGGCAGCAG |
| 16S rRNA -R | ATTACCGCGGCTGCTGG |
| sul1 | sul1-F | CACCGGAAACATCGCTGCA |
| sul1 -R | AAGTTCCGCCGCAAGGCT |
| sul2 | sul2-F | TCCGGTGGAGGCCGGTATATGG |
| sul2-R | CGGGAATGCCATCTGCCTTGAG |
| ermB | ermB -F | AAAACTTACCCGCCATACCA |
| ermB -R | TTTGGCGTGTTTCATTGCTT |
| ermE | ermE -F | TGTTCGAGTGGGAGTTCGT |
| ermE -R | GGTACTTGCGCAGAAGCGA |
| tetA | tetA -F | GCTACATCCTGCTTGCCTTC |
| tetA -R | CATAGATCGCCGTGAAGAGG |
| tetC | tetC -F | CTTGAGAGCCTTCAACCCAG |
| tetC-R | ATGGTCGTCATCTACCTGCC |
| tetW | tetW-F | GAGAGCCTGCTATATGCCAGC |
| tetW-R | GGGCGTATCCACAATGTTAAC |
| tetX | tetX-F | AGCCTTACCAATGGGTGTAAA |
| tetX-R | TTCTTACCTTGGACATCCCG |
| cmlA1-01 | cmlA1-01 -F | TAGGAAGCATCGGAACGTTGAT |
| cmlA1-01 -R | CAGACCGAGCACGACTGTTG |
| cmlA1-02 | cmlA1-02 -F | AGGAAGCATCGGAACGTTGA |
| cmlA1-02 -R | ACAGACCGAGCACGACTGTTG |
| intl1 | intI1-F | CCTCCCGCACGATGATC |
| intI1-R | TCCACGCATCGTCAGGC |
